# Supplementary material for: Glycated Hemoglobin and Risk of Hypertension in the Atherosclerosis Risk in Communities Study
Source: Oxford University Press journal article supplement (doi:10.2337/dc11-2248), 2012-03-20
Supplement: dc112248supplementarydata.pdf [file dc112248supplementarydata.pdf]

# SUPPLEMENTARY DATA

**Supplementary Table 1.** Hazard ratios per 1 mg/dL fasting glucose for incident hypertension among ARIC participants, stratified by diabetes status at Visit 2.

|                               | <b>No History of Diabetes</b>     |                                 | <b>Diagnosed Diabetes</b>         |                                 |
|-------------------------------|-----------------------------------|---------------------------------|-----------------------------------|---------------------------------|
|                               | <i>Self-reported hypertension</i> | <i>Visit-based hypertension</i> | <i>Self-reported hypertension</i> | <i>Visit-based hypertension</i> |
|                               | (mean follow-up: 16.1 years)      | (mean follow-up: 5.5 years)     | (mean follow-up: 9.1 years)       | (mean follow-up: 5.1 years)     |
| <b># Cases / Participants</b> | 4729/8906                         | 1645/7062                       | 377 / 543                         | 105/331                         |
| Model 1                       | 1.008 (1.006-1.009)*              | 1.004 (1.002-1.007)*            | 1.003 (1.001-1.004)*              | 1.004 (1.001-1.006)*            |
| Model 2                       | 1.006 (1.004-1.007)*              | 1.002 (1.000-1.005)             | 1.002 (1.001-1.004)*              | 1.004 (1.001-1.006)*            |
| Model 3                       | 1.003 (1.001-1.005)*              | 0.999 (0.996-1.002)             | 1.002 (1.001-1.003)*              | 1.003 (1.001-1.006)*            |

Model 1: Adjusted for age, sex, race, and center.

Model 2: Model 1 + smoking, physical activity, educational attainment, triglycerides (ln-transformed).

Model 3: Model 2 + body mass index, waist-to-hip ratio.

\*  $p < 0.05$ .

# SUPPLEMENTARY DATA

**Supplementary Table 2.** Hazard ratios for incident hypertension using fasting glucose clinical categories.

|                                                         | No History of Diabetes |                   |                                       | Diagnosed Diabetes | P trend |
|---------------------------------------------------------|------------------------|-------------------|---------------------------------------|--------------------|---------|
| Fasting glucose category                                | <100 mg/dL(ref)        | 100-125 mg//dL    | ≥ 126 mg/dL<br>(undiagnosed diabetes) |                    |         |
| Self-reported hypertension (Mean follow-up: 11.6 years) |                        |                   |                                       |                    |         |
| Model 1                                                 | 1.00                   | 1.24 (1.17-1.32)* | 1.60 (1.43-1.80)*                     | 2.13 (1.91-2.39)*  | < 0.001 |
| Model 2                                                 | 1.00                   | 1.18 (1.11-1.26)* | 1.42 (1.26-1.59)*                     | 1.86 (1.66-2.09)*  | < 0.001 |
| Model 3                                                 | 1.00                   | 1.08 (1.02-1.15)* | 1.23 (1.09-1.38)*                     | 1.59 (1.42-1.79)*  | < 0.001 |
| Visit-based hypertension (Mean follow-up: 5.4 years)    |                        |                   |                                       |                    |         |
| Model 1                                                 | 1.00                   | 1.12 (1.01-1.24)* | 1.14 (0.93-1.41)                      | 1.40 (1.15-1.71)*  | 0.005   |
| Model 2                                                 | 1.00                   | 1.07 (0.96-1.18)  | 1.01 (0.81-1.25)                      | 1.22 (0.99-1.49)   | 0.241   |
| Model 3                                                 | 1.00                   | 0.99 (0.89-1.19)  | 0.89 (0.71-1.10)                      | 1.03 (0.84-1.27)   | 0.675   |

For self-reported hypertension analyses 5177 incident hypertension cases were observed of 9603 participants in the analytic sample. For visit-based analyses 1789 incident cases were observed of 7551 participants in the analytic sample.

Model 1: Adjusted for age, sex, race, and center.

Model 2: Model 1 + smoking, physical activity, educational attainment, triglycerides (ln-transformed).

Model 3: Model 2 + body mass index, waist-to-hip ratio.

\* p < 0.05.
